# Supplementary material for: Sequence variants in oxytocin pathway genes and preterm birth: a candidate gene association study
Source: PubMed Central journal article supplement (PMC3737028; doi:10.1186/1471-2350-14-77), 2013-07-26
Supplement: 1471-2350-14-77-S1.pdf [file 1471-2350-14-77-S1.pdf]

Additional file 1

Table S1 List of rare missense variants in exon 3 of *OXTR* catalogued in public databases (1000GP, NHLBI ESP)

| dbSNP ID    | Amino acid substitution <sup>1</sup> | 1000GP   | NHLBI ESP         |                  |
|-------------|--------------------------------------|----------|-------------------|------------------|
|             |                                      | European | European American | African American |
|             |                                      | mA / MA  | mA / MA           | mA / MA          |
|             | <b>A11T</b>                          |          |                   |                  |
|             | <b>V45L</b>                          |          | 7 / 8483          | 0 / 4348         |
|             | C47Y                                 |          | 0 / 8524          | 1 / 4365         |
| rs143644523 | L74F                                 |          | 1 / 8587          | 0 / 4394         |
| rs202138705 | <b>P108A</b>                         |          |                   |                  |
| rs115324487 | <b>V172A</b>                         | 3 / 755  | 1 / 8599          | 243 / 4161       |
|             | W188C                                |          | 1 / 8599          | 0 / 4406         |
|             | P194S                                |          | 1 / 8599          | 0 / 4406         |
| rs200498154 | <b>W203R</b>                         |          |                   |                  |
| rs150746704 | <b>L206V</b>                         |          | 1 / 8599          | 81 / 4325        |
|             | <b>V211L</b>                         |          |                   |                  |
| rs143908202 | G221S                                |          | 0 / 8598          | 30 / 4374        |
|             | I227M                                |          | 0 / 8598          | 1 / 4399         |
| rs145921539 | W228C                                |          | 0 / 8596          | 6 / 4394         |
| rs151141371 | <b>G252A</b>                         |          | 2 / 8590          | 0 / 4392         |
| rs139854982 | R254C                                |          | 0 / 8594          | 1 / 4391         |
|             | V274I                                |          | 1 / 8599          | 0 / 4406         |
| rs144814761 | <b>V281M</b>                         |          | 4 / 8596          | 0 / 4406         |
| rs201783860 | <b>F284L</b>                         |          |                   |                  |

<sup>1</sup>Variants identified in the current study are shown in bold.

mA, minor allele count; MA, major allele count; 1000GP, the 1000 Genomes Project; NHLBI\_ESP, the National Heart, Lung, and Blood Institute Exome Sequencing Project.
