# Supplementary material for: Sequence variants in oxytocin pathway genes and preterm birth: a candidate gene association study
Source: PubMed Central journal article supplement (PMC3737028; doi:10.1186/1471-2350-14-77), 2013-07-26
Supplement: 1471-2350-14-77-S2.pdf [file 1471-2350-14-77-S2.pdf]

## Additional file 2

**Table S2 Results of regression analyses of *OXTR* coding variants predicting gestational age (GA) in Danish case and control mothers<sup>1</sup>**

| Variant               | GA in weeks <sup>2</sup> |          | GA as a binary trait <sup>3</sup>     |          |
|-----------------------|--------------------------|----------|---------------------------------------|----------|
|                       | <i>n</i> <sup>4</sup>    | <i>P</i> | <i>n</i> (case, control) <sup>4</sup> | <i>P</i> |
| rs237913 <sup>5</sup> | 1591                     | 0.08     | 691, 900                              | 0.11     |
| rs237911              | 1598                     | 0.22     | 696, 902                              | 0.44     |
| A11T                  | 1602                     | 0.53     | 697, 905                              | 0.98     |
| V45L                  | 1602                     | 0.28     | 696, 906                              | 0.97     |
| V211L                 | 1590                     | 0.39     | 698, 892                              | 0.86     |
| rs4686302 (A218T)     | 1592                     | 0.57     | 701, 891                              | 0.54     |
| rs237902 (N230N)      | 1586                     | 0.26     | 697, 889                              | 0.35     |
| rs61740241 (A238T)    | 1588                     | 0.46     | 698, 890                              | 0.26     |
| A247A                 | 1587                     | 0.79     | 696, 891                              | 0.44     |
| rs151141371 (G252A)   | 1588                     | 0.35     | 698, 890                              | 0.25     |
| rs144814761 (V281M)   | 1588                     | 0.38     | 697, 891                              | 0.98     |

<sup>1</sup>The analysis was performed for all common and rare variants identified by sequencing.

<sup>2</sup>GA was considered as a continuous variable.

<sup>3</sup>GA was considered as a categorical variable (preterm,  $\leq 36$  weeks; and term, 40 weeks).

<sup>4</sup>Number of individuals successfully genotyped and included in the analysis.

<sup>5</sup>The best genetic effect model.
